# Supplementary material for: Redox-induced target-dependent ratiometric fluorescence sensing strategy and logic gate operation for detection of α-glucosidase activity and its inhibitor
Source: Royal Society of Chemistry journal article supplement (doi:10.1039/d1dt01299a), 2021-01-01
Supplement: d1dt01299a1.pdf [file d1dt01299a1.pdf]

## Supplementary Material

### **Redox-induced target-dependent ratiometric fluorescence sensing strategy and logic gate operation for detection of $\alpha$ -glucosidase activity and its inhibitor**

Xucan Yuan<sup>a</sup>, Yi Sun<sup>b</sup>, Pengfei Zhao<sup>c</sup>, Longshan Zhao<sup>a\*</sup>, Zhili Xiong<sup>a\*</sup>

*<sup>a</sup> School of Pharmacy, Shenyang Pharmaceutical University, 103 Wenhua Road Shenhe District, Shenyang, Liaoning, 110016, P. R. China*

*<sup>b</sup> Beijing Institute For Drug Control, 102206, P. R. China*

*<sup>c</sup> Department of Clinical Pharmacy, Weifang People's Hospital, 151 Guangwen Street Kuiwen District, Weifang, Shandong, 261031, P. R. China*

**\*Correspondence:** Professor Zhili Xiong; Professor Longshan Zhao, School of Pharmacy, Shenyang Pharmaceutical University, 103 Wenhua Road Shenhe District, 110016, Shenyang, Liaoning Province, P. R. China.

E-mail: bearry200@126.com (Zhili Xiong); longshanzhao@163.com (Longshan Zhao).

Tel./Fax.: +86-24-43520571.

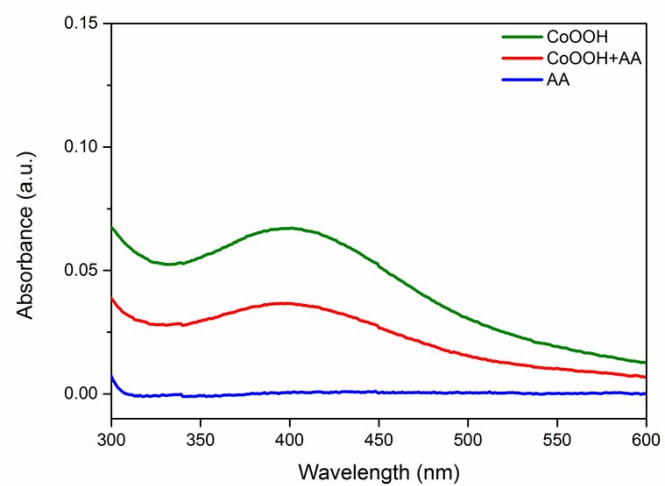

**Fig. S1.** The UV-vis absorption spectra of CoOOH, CoOOH+AA and AA.

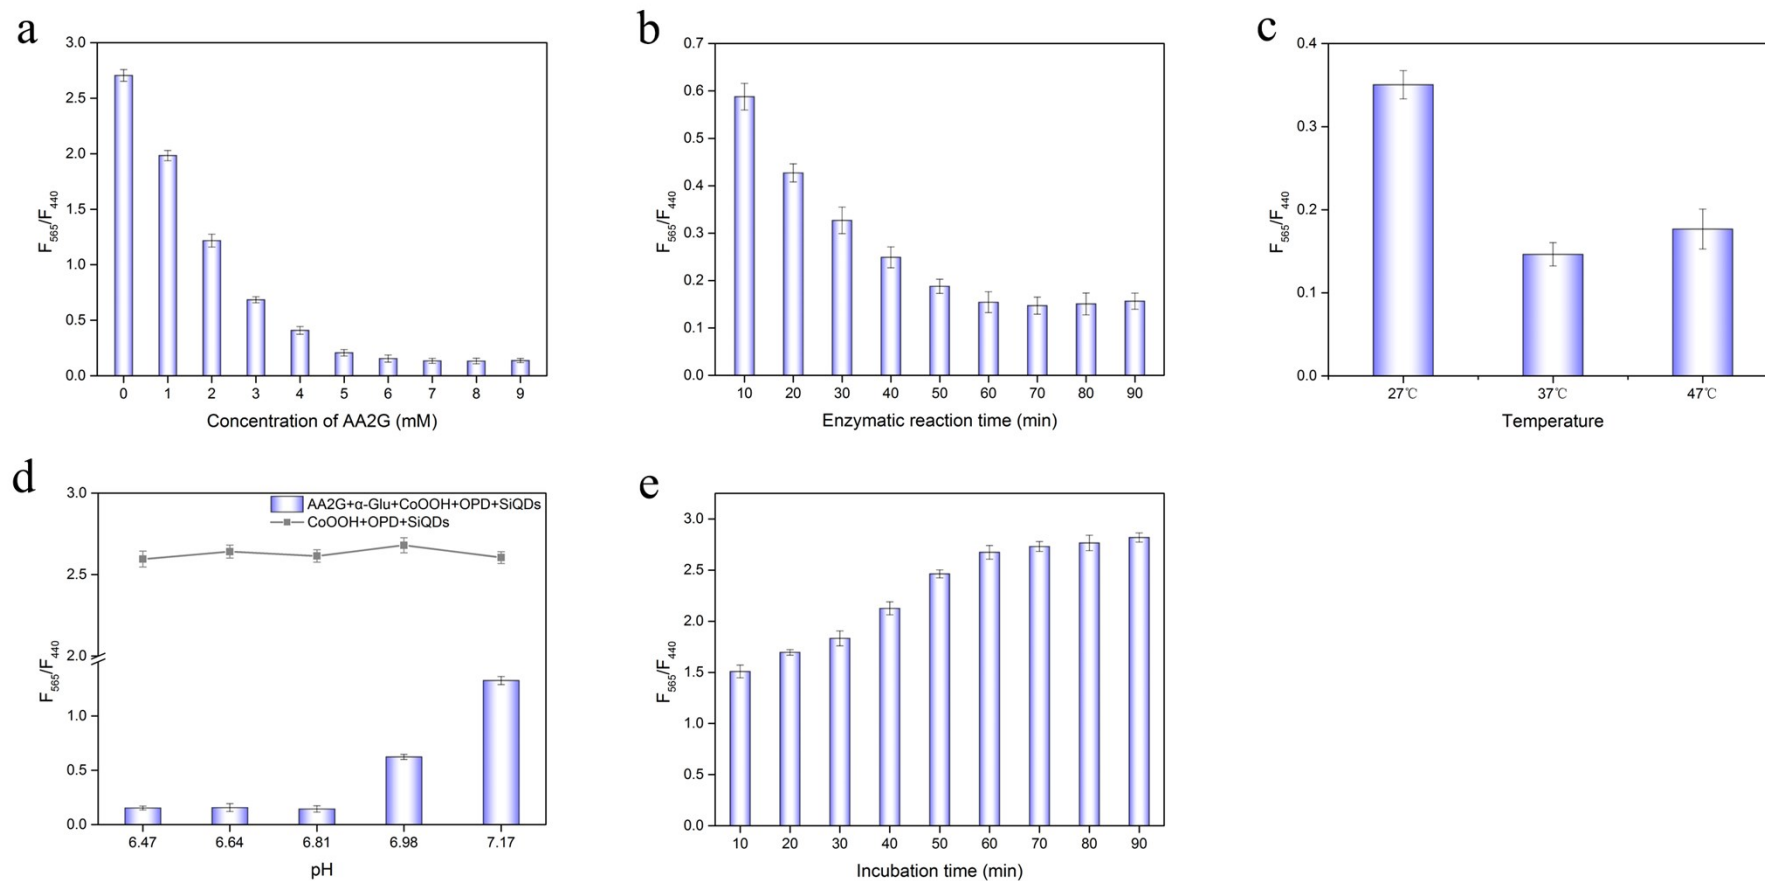

**Fig. S2.** The effects of the concentration of AA2G (a); enzymatic reaction time (b); reaction system temperature (c); solution pH (d) and incubation time (e) on fluorescence intensity of reaction system.

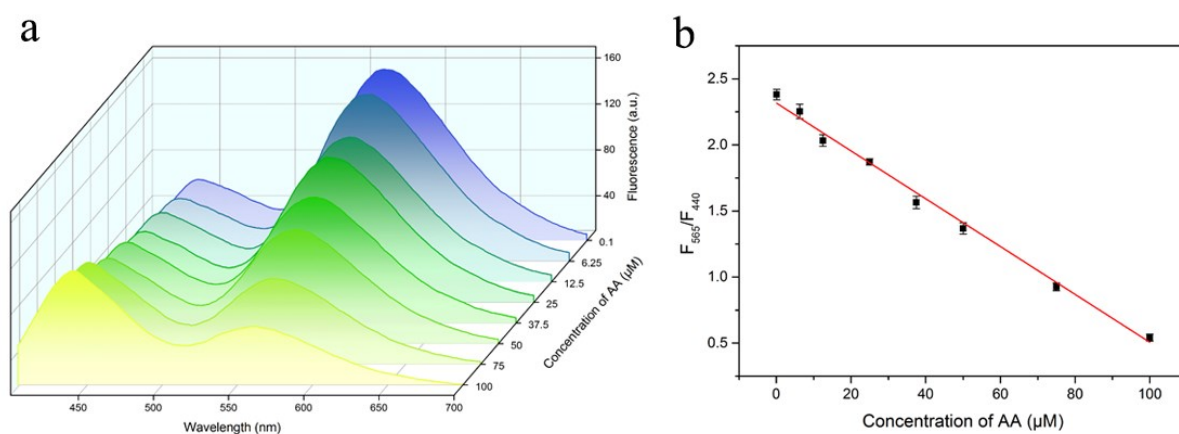

**Fig. S3.** Fluorescence emission spectra of ratiometric fluorescence sensing system with different concentrations of AA (a); the linear relationship between  $F_{565}/F_{440}$  and AA concentration (b).
